# Supplementary material for: Huangqin flavonoid extraction for spinal cord injury in a rat model
Source: PubMed Central journal article supplement — Neural Regen Res. 2018 Dec;13(12):2200–8. doi: 10.4103/1673-5374.241472 (PMC6199921; doi:10.4103/1673-5374.241472), 2018-12
Supplement: NRR-13-2200_Suppl1.pdf [file NRR-13-2200_Suppl1.pdf]

## Additional file 1 Chemical fingerprint of huangqin flavonoids extraction

### Preparation of samples

Sample of huangqin flavonoids extraction was diluted with methanol aqueous solution (methanol: pure water = 1:1; V:V), then centrifuged at 8000 r/min for 10 minutes and supernatant was injected for analysis.

### LC-MS instruments and operation conditions

#### *Liquid chromatography*

An SHIMAZDU 30AD System was used (Shimadzu Corp., Japan) to inject 5  $\mu$ L aliquots of samples on an Acquity UPLC HSS T3 column (100  $\times$  2.1 mm, i.d., 1.8 mm, Waters, USA) which was maintained at 35°C in a column oven. The mobile phase was consisting of (A) 0.1% formic acid aqueous solution (prepared using Milli Q water) and (B) acetonitrile at a flow rate of 0.5 mL/min using a gradient elution program showed in **Additional Table 1**.

Additional Table 1 Gradient program of liquid chromatography

| Time (minute) | Mobile phase B (%) |
|---------------|--------------------|
| 0             | 3                  |
| 1             | 3                  |
| 23            | 95                 |
| 26            | 95                 |
| 26.1          | 3                  |
| 30            | 3                  |

#### *Mass spectrometric conditions*

A Triple TOF 5600+ mass spectrometer (AB Sciex Corp., USA) equipped with an electrospray ionization (ESI) interface was used. The operating parameters were as follows: curtain gas, 30 L/h; GS1, 50 L/h; GS2, 60 L/h; ISVF, 5500 V(+), 4500 V(-); desolvation temperature, 500°C. ESI/MS was operated both in positive and negative modes in in TOF-MS-IDA-TOF-MS/MS ( $n = 8$ ; TOF-MS: 100-1200 Da, TOF-MS/MS: 50-1200 Da).

The chemical fingerprint of huangqin flavonoids extraction in positive mode (ESI+) and negative mode (ESI-) were showed in **Additional Figures 1** and **2**, respectively.

TIC from H\_wiff (sample 1) - H, Experiment 1, +TOF MS (100 - 1200)

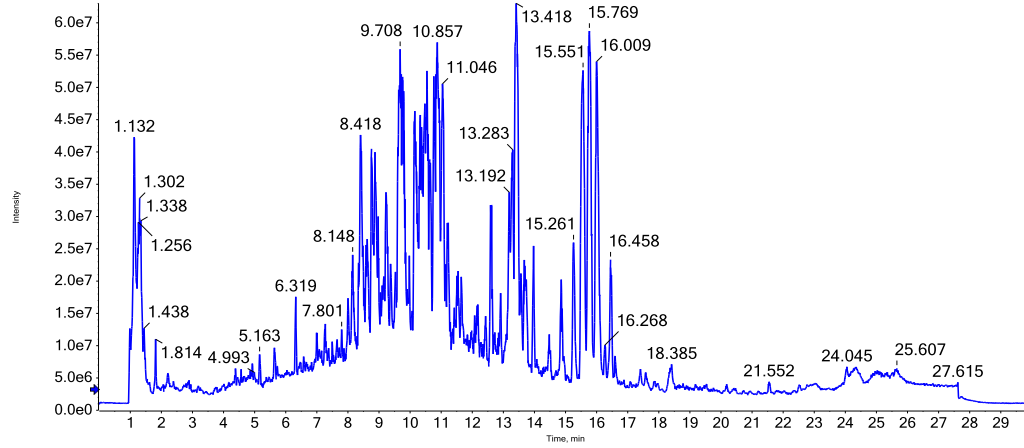

Additional Figure 1 Chemical fingerprint of huangqin flavonoids extraction in positive mode (ESI+)

TIC from H\_Neg.wiff (sample 1) - H, Experiment 1, -TOF MS (100 - 1200)

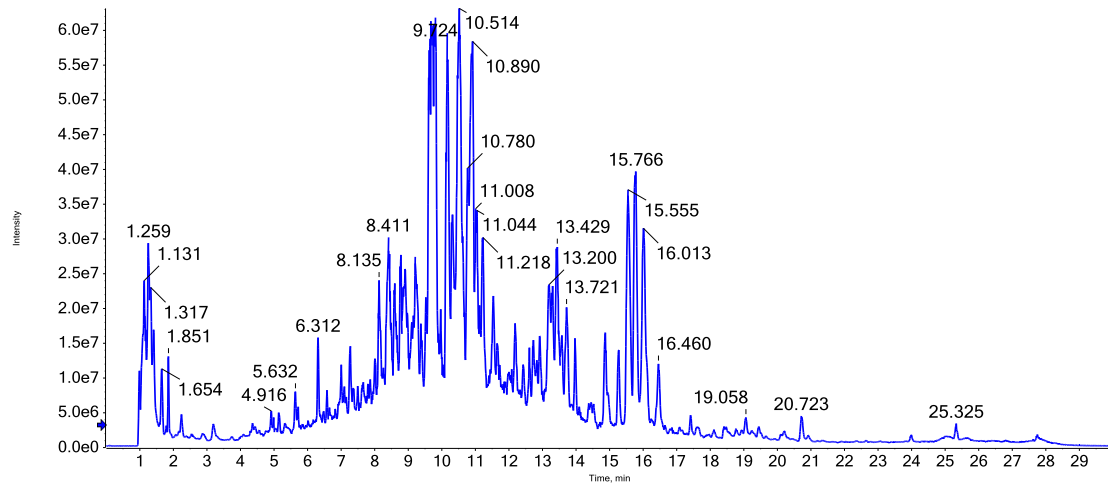

Additional Figure 2 Chemical fingerprint of huangqin flavonoids extraction in negative mode (ESI-)
